# Supplementary material for: Synthesis of the mixed lithium–potassium–(bis)magnesium N-metallated/N, C-dimetallated amide [Li2K2Mg4{But(Me3Si)N}4{But[Me2(H2C)Si]N}4]: an inverse crown molecule with an atomless cavityElectronic supplementary information (ESI) available: NMR spectra. See http://www.rsc.org/suppdata/cc/b3/b301374j/
Source: Royal Society of Chemistry journal article supplement (doi:10.1039/b301374j), 2003-04-17
Supplement: b301374j.doc [file b301374j.doc]

Supplementary Material for Chemical Communications

This journal is © The Royal Society of Chemistry 2003

**Synthesis of the mixed lithium-potassium-(bis) magnesium N-metallated/N,C-dimetallated amide [Li2K2Mg4{But(Me3Si)N}4{But[Me2(H2C)Si]N4}]: an inverse crown molecule with an atomless cavity**

Glenn C. Forbes, Fiona R. Kenley, Alan R. Kennedy, Robert E. Mulvey, Charles T. O’Hara and John A. Parkinson

# Supporting Information

**Figure S1**: 2D [1H, 13C] HSQC NMR spectrum acquired at a magnetic field strength of 9.4 T and optimised for 1*J*(1H, 13C) = 136 Hz (1/4*J* = 1.8 ms). **a)** N-methyl region; **b)** Silyl-methyl region.

**-2.0**

**a)**

**b)**

**1**

**13C (ppm)**

**2 – 1H (ppm)**

 10

**Figure S2**: 2D [1H, 29Si] HSQC NMR spectrum acquired at a magnetic field strength of 9.4 T and optimised for 2*J*(1H, 29Si) = 6.6 Hz (1/4*J* = 38 ms). **a)** 0.0-0.7 ppm (1H) region; **b)** Low ppm region indicating that the signal at -1.9 ppm is associated with a CH2 group adjacent to 29Si (non-equivalent geminal protons giving rise to two signals with strong coupling [large ‘roof effect’]). At this temperature the broad 1H resonance at –1.5 ppm does not give rise to a correlation with 29Si.

 10

**a)**

**b)**

**1**

**29Si (ppm)**

**2 - 1H (ppm)**

**-2.0**

**Figure S3**: N-methyl region of the 1H 2D EXSY NMR spectrum acquired at a magnetic field strength of 9.4 T (mixing time = 500 ms). 1D 1H NMR spectra of the same regions are shown as projections (top and side). Cross-peaks indicate the presence of exchange.

**2 – 1H (ppm)**

Figure S4: Low-temperature 1H NMR spectra acquired at 400 MHz.

 10

**2 –1H (ppm)**
